# Supplementary material
Source: publisher figshare collection journal article supplement (https://gsapubs.figshare.com/ndownloader/files/23292806)
Supplement: Supplementary file 1 [file 23292806]

TABLE 1. ESTIMATES OF GLACIAL EROSION IN THE SOUTHWESTERN BARENTS SEA

|               | Age<br>(Ma)  | Volume<br>( $\times 10^3$ km <sup>3</sup> ) | Source area<br>( $\times 10^3$ km <sup>2</sup> ) | Erosion<br>(m) | Average erosion<br>(mm/yr) | Average sedimentation rate<br>(cm/k.y.) |
|---------------|--------------|---------------------------------------------|--------------------------------------------------|----------------|----------------------------|-----------------------------------------|
| Last glacial  | 21.5–17.5 ka | 1.5                                         | 200                                              | 7              | 1.7 (1.0) <sup>§</sup>     | 53                                      |
| GIII/TeE      | 0–0.7        | 87 <sup>*</sup> /106 <sup>†</sup>           | 200                                              | 440/530        | 0.6/0.8                    | 18 <sup>#</sup> /22 <sup>#</sup>        |
| Reflection R1 |              |                                             |                                                  |                |                            |                                         |
| GII/TeD       | 0.7–1.5      | 242 <sup>*</sup> /190 <sup>†</sup>          | 576                                              | 420/330        | 0.5/0.4                    | 64 <sup>#</sup> /50 <sup>#</sup>        |
| Reflection R5 |              |                                             |                                                  |                |                            |                                         |
| GI/TeC        | 1.5–ca. 2.7  | 135 <sup>*</sup> /99 <sup>†</sup>           | 576                                              | 230/170        | 0.2/0.15                   | 22 <sup>#</sup> /16 <sup>#</sup>        |
| Reflection R7 |              |                                             |                                                  |                |                            |                                         |
| Total         | 0–ca. 2.7    | 464 <sup>*</sup> /395 <sup>†</sup>          |                                                  | 1090/1030      | 0.41/0.38                  | 40 <sup>#</sup> /38 <sup>#</sup>        |

Note: Table shows age (Knies et al., 2009) and volume of glacial sediments deposited along the SW Barents Sea continental margin, the sediment source area (from Vorren et al., 1991), estimated erosion and average erosion in the source area, and corresponding average sedimentation rates along the margin for the late Pliocene–Pleistocene period.

<sup>\*</sup>Vorren et al. (1991).

<sup>†</sup>Fiedler and Faleide (1996).

<sup>§</sup>Elverhøi et al. (1998).

<sup>#</sup>Based on estimates of depositional area by Vorren et al. (1991).

TABLE 2. COMPILATION OF GLACIAL EROSION AND SEDIMENTATION RATE ESTIMATES FROM GLACIATED AREAS OF THE NORTHERN AND SOUTHERN HEMISPHERE

| Area                      | Average erosion rate<br>(mm/yr) | Average sedimentation rate<br>(cm/k.y.) | Period<br>(Ma) | Reference                       |
|---------------------------|---------------------------------|-----------------------------------------|----------------|---------------------------------|
| Southwestern Barents Sea  | 0.4                             | 38                                      | 0–2.7          | This study                      |
| Western Fennoscandia      | 0.19                            | 24                                      | 0–2.7          | Dowdeswell et al. (2010)        |
| Southwestern Fennoscandia | 0.12                            |                                         | 0–1.1          | Hjelstuen, 2011, personal comm. |
| Eastern Canada            | 0.13                            |                                         | 0–0.8          | Hiscott and Aksu (1996)         |
| East Greenland            |                                 | 2.8/4.8                                 | 0–0.8          | Berger and Jokat (2008)         |
| East Antarctica           | 0.001–0.002                     |                                         | 0–34           | Jamieson et al. (2005)          |

*Note:* Table shows rates of glacial erosion and sedimentation in areas affected by the Barents Sea ice sheet (southwestern Barents Sea), the Fennoscandian ice sheet (western and southwestern parts), the Laurentide ice sheet (eastern Canada), the Greenland ice sheet (east Greenland), and the East Antarctic Ice Sheet (east Antarctica) averaged over the duration of the ice sheets.
